# Supplementary material for: In Vitro Metabolic Study of Four Synthetic Cathinones: 4-MPD, 2-NMC, 4F-PHP and bk-EPDP
Source: MDPI journal article supplement (doi:10.3390/metabo12020115), 2022-01-25
Supplement: s1 [file s1]

# In Vitro Metabolic Study of Four Synthetic Cathinones: 4-MPD, 2-NMC, 4F-PHP and bk-EPDP

Ivana Gavrilović<sup>1</sup>, Yunita Gelu<sup>2</sup> and Vincenzo Abbate<sup>2,\*</sup>

<sup>1</sup> Drug Control Centre, King's College London, Franklin Wilkins Building, 150 Stamford Street, London SE1 9NH, UK; ivana.gavrilovic@kcl.ac.uk

<sup>2</sup> Department of Analytical, Environmental and Forensic Sciences, King's College London, 150 Stamford Street, London SE1 9NH, UK; yunita.gelu@kcl.ac.uk

\* Correspondence: vincenzo.abbate@kcl.ac.uk; Tel.: +44-(0)207-83895

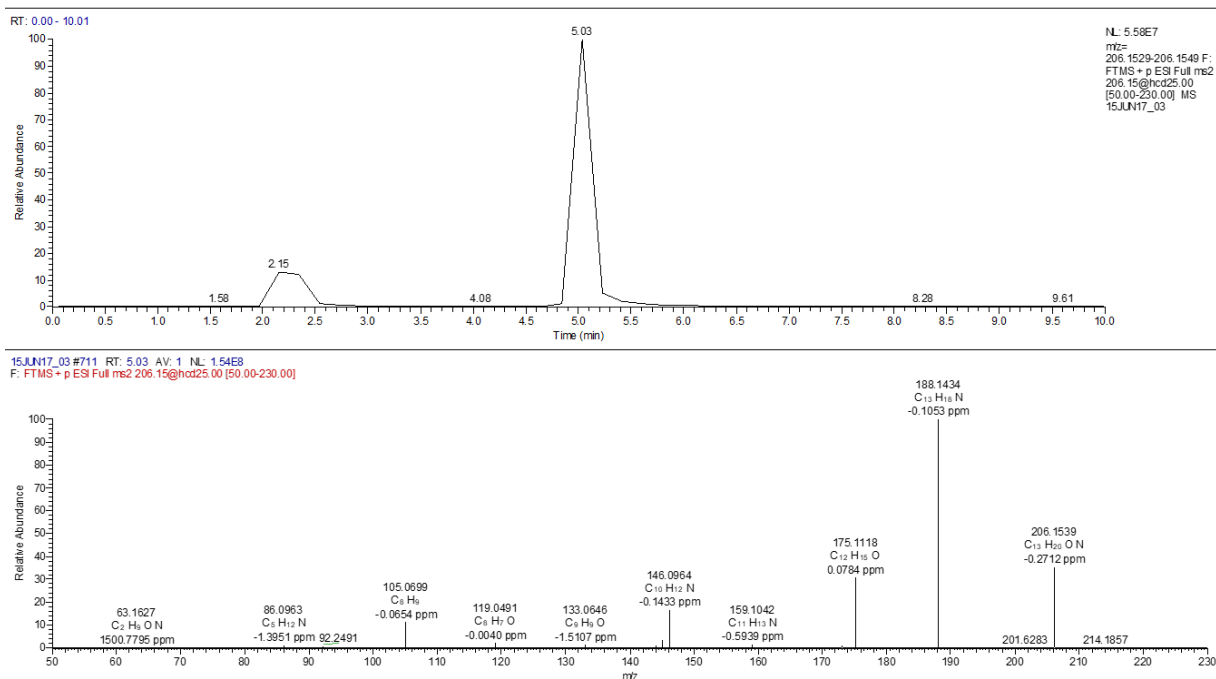

**Figure S1:** Extracted ion chromatogram and MS<sup>2</sup> spectra of unmetabolized 4-MPD (proposed fragment ion structures were reported by Apirakkan et al doi:10.1002/dta.2218).

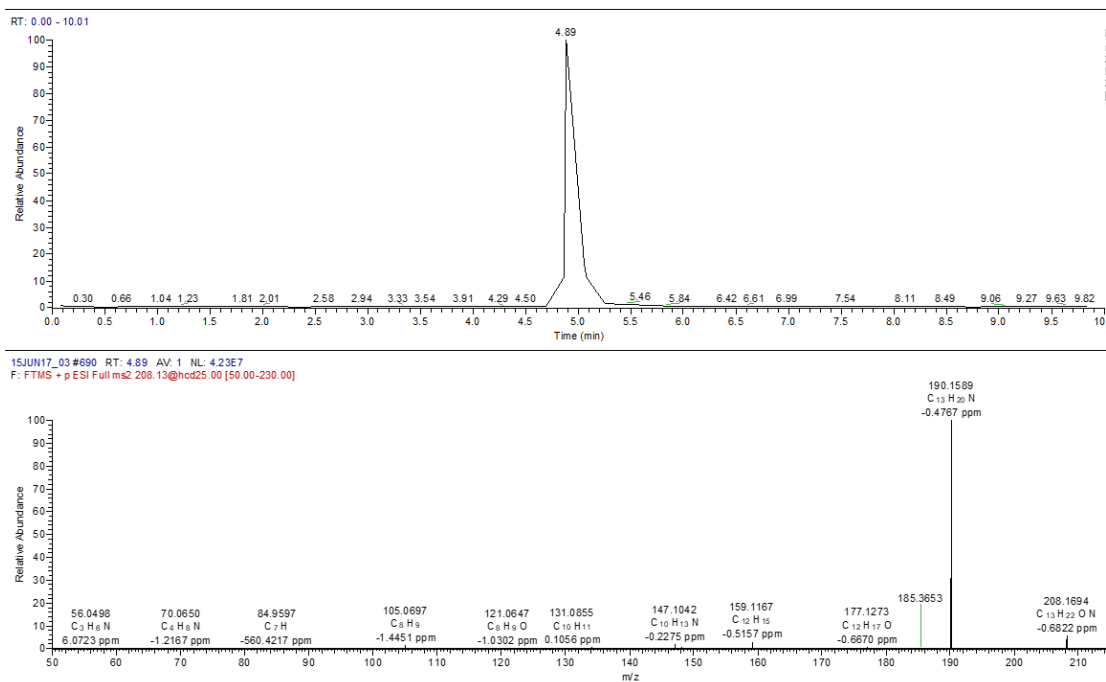

**Figure S2:** Extracted ion chromatogram and MS<sup>2</sup> spectra of 4-MPD M1.

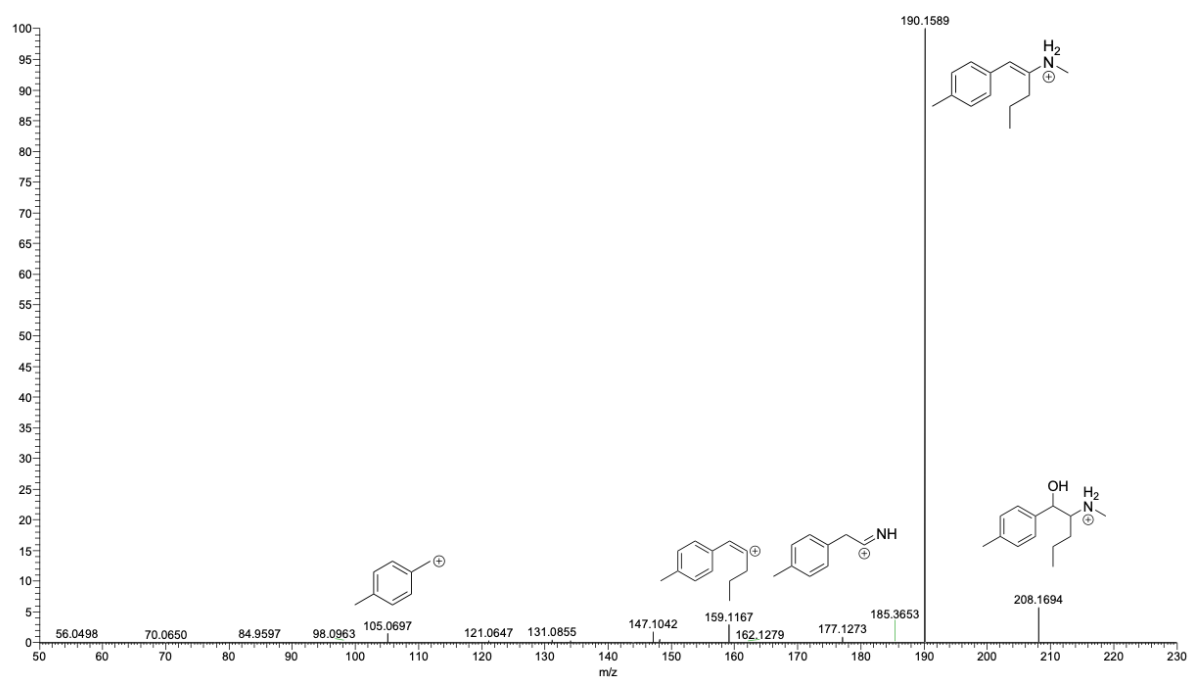

**Figure S3:** 4-MPD M1 proposed fragmentation pattern.

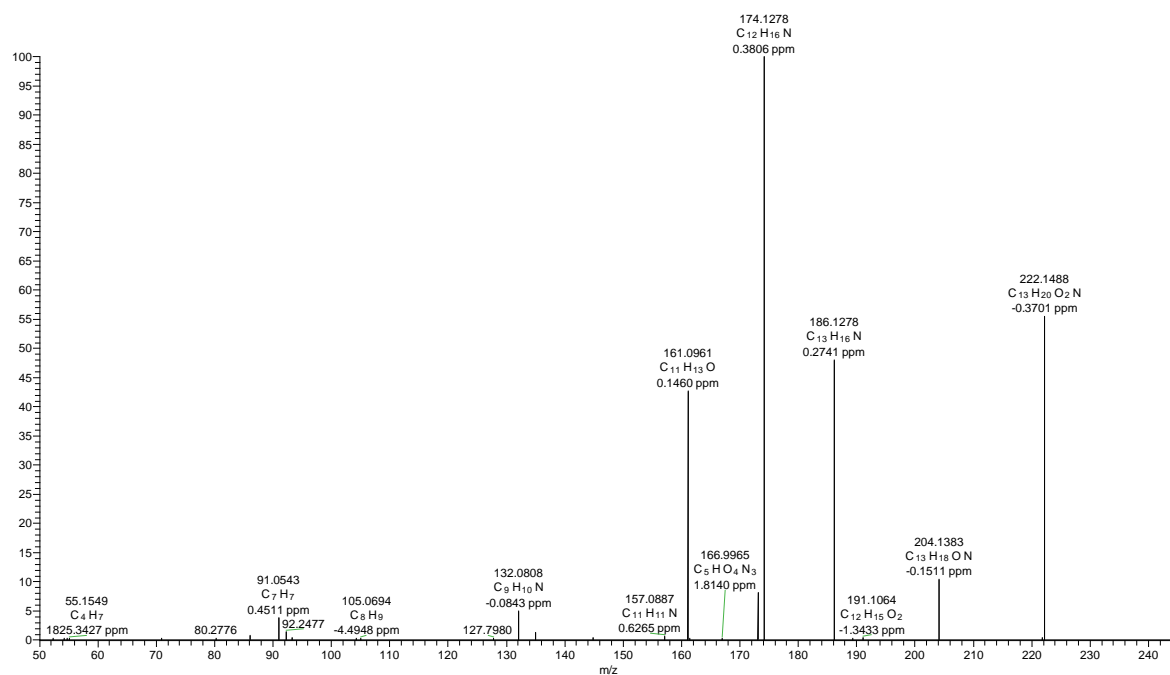

Figure S4: 4-MPD M2 MS<sup>2</sup> spectra.

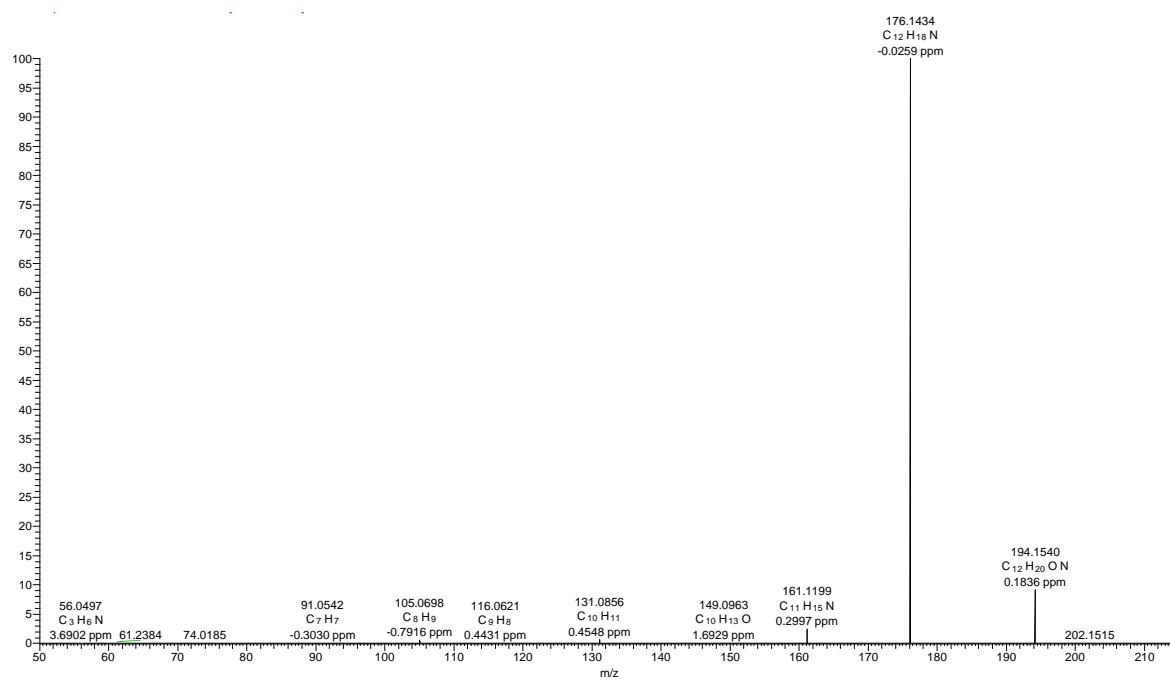

Figure S5: 2-NMC M6 MS<sup>2</sup> spectra.

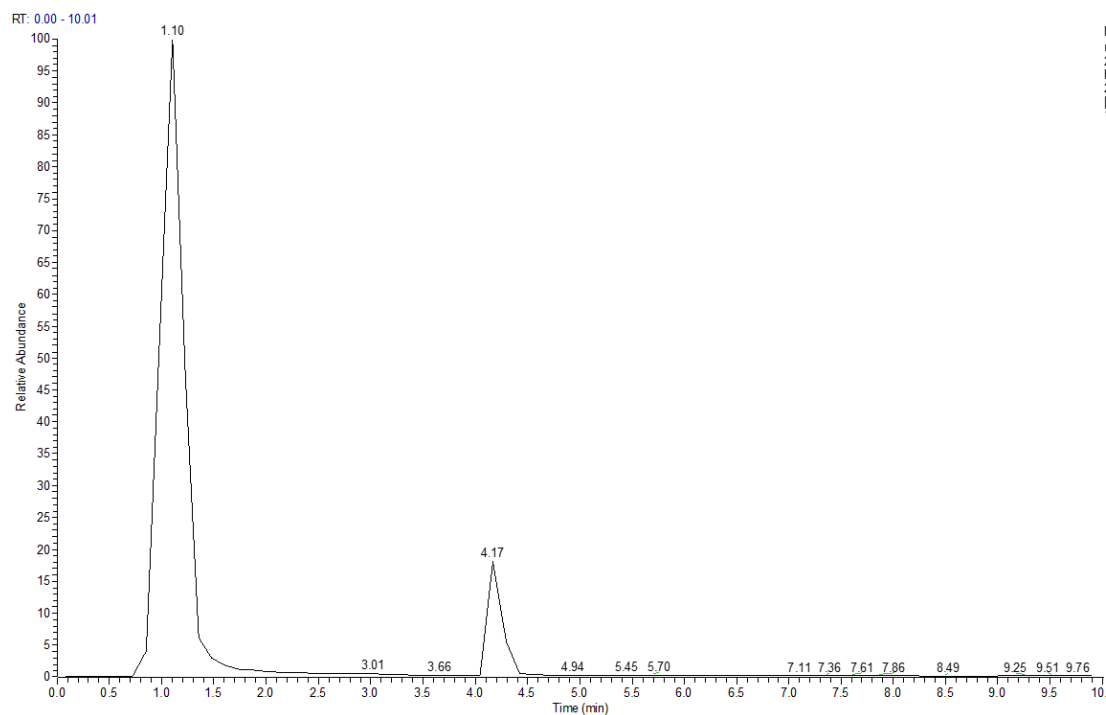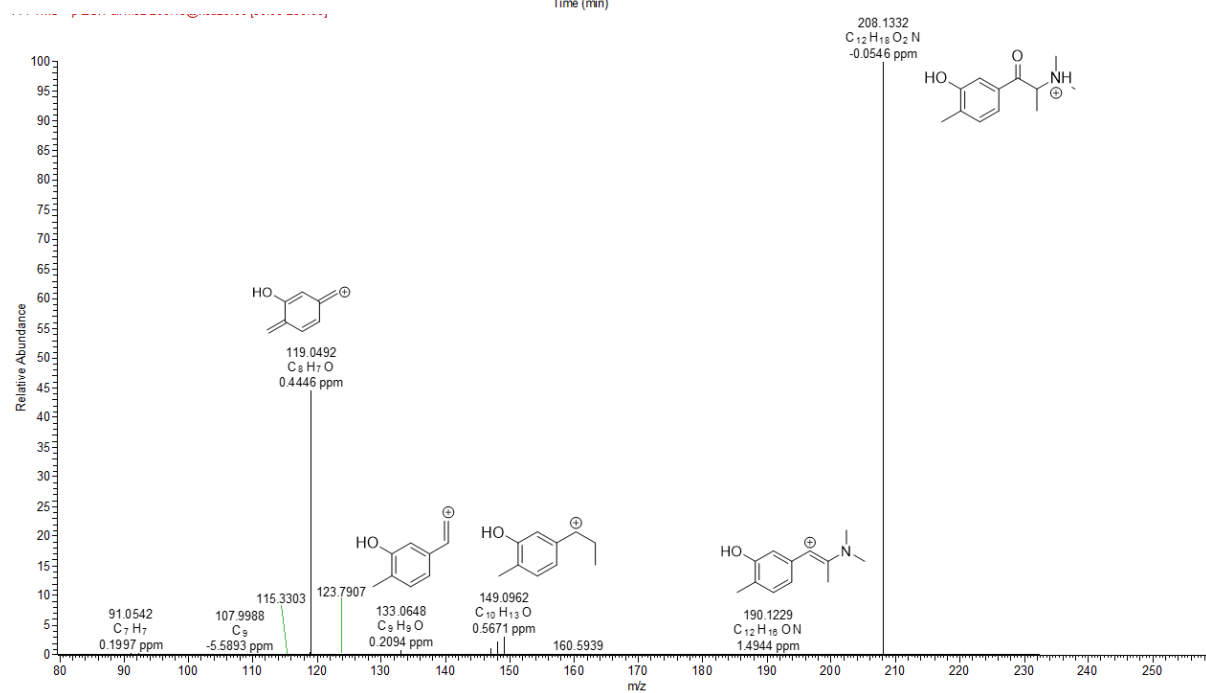

**Figure S6:** 2-NMC M7 extracted ion chromatogram (Rt = 4.17 min) and MS<sup>2</sup> spectra with proposed fragmentation pattern.

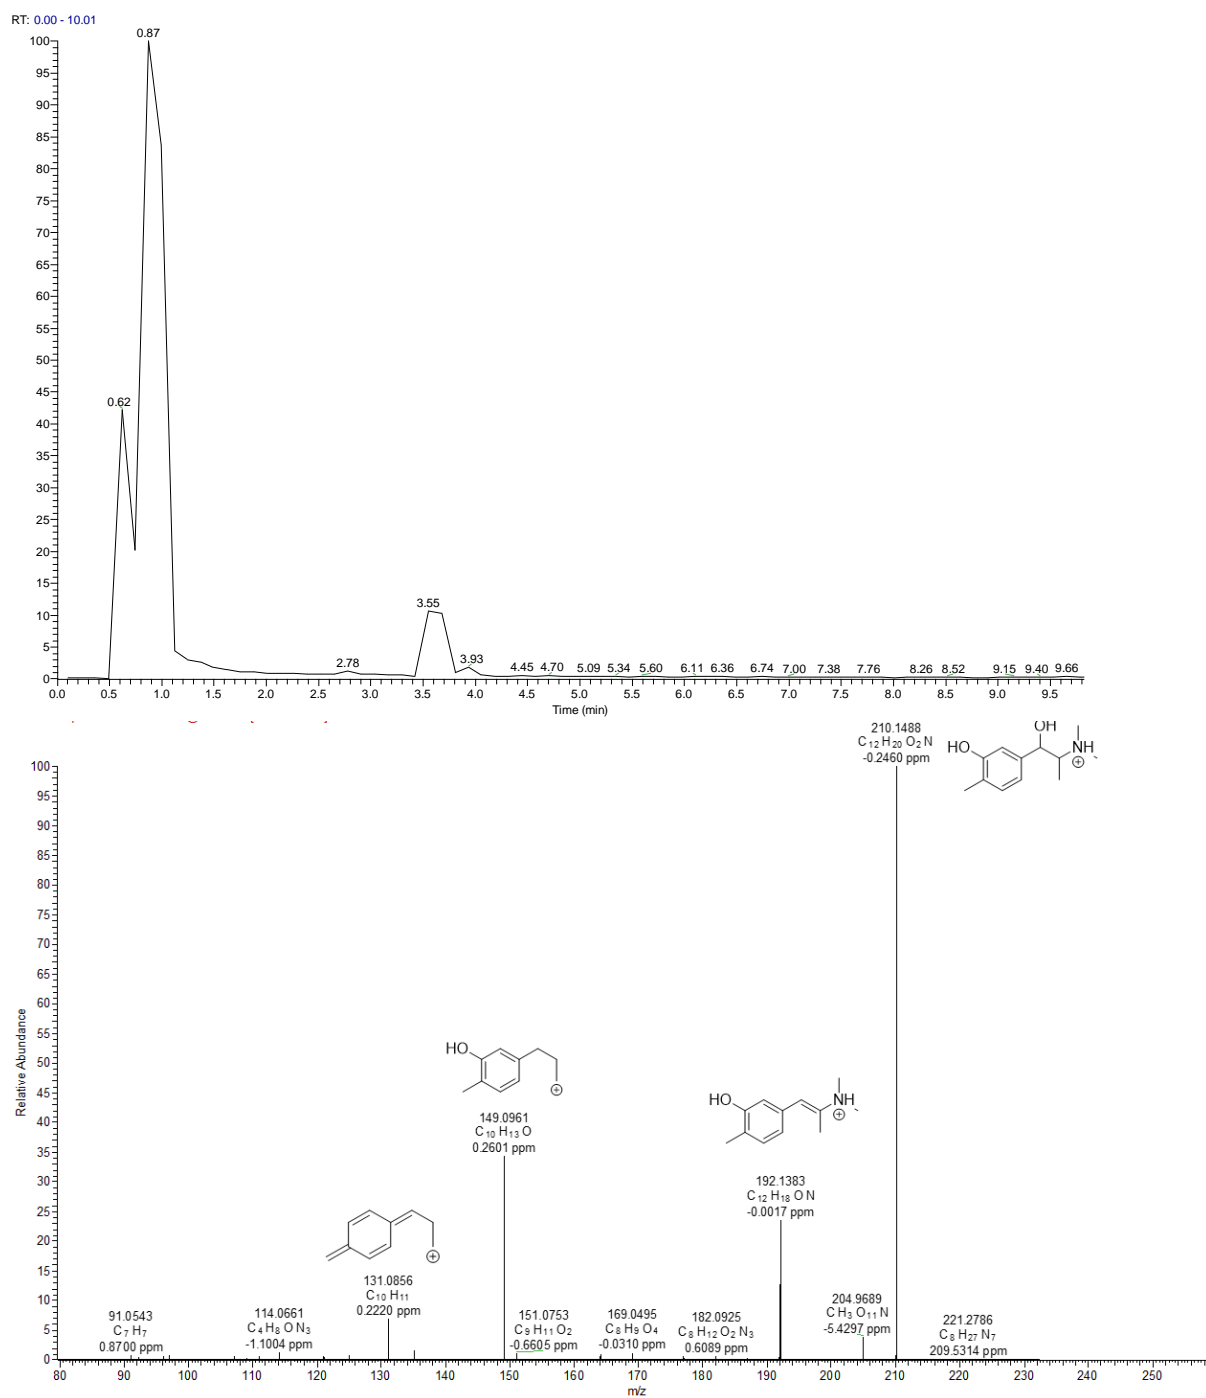

**Figure S7:** 2-NMC M9 extracted ion chromatogram ( $R_t = 3.55$  min) and  $MS^2$  spectra with proposed fragmentation pattern.

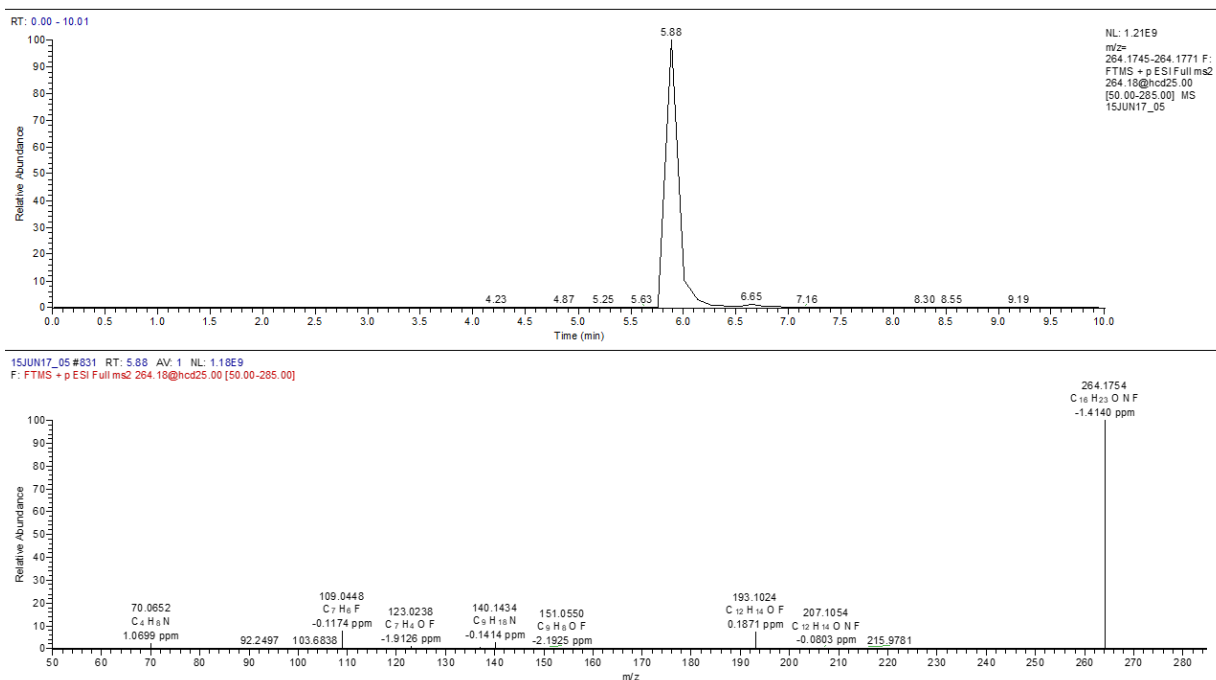

**Figure S8:** Extracted ion chromatogram and MS<sup>2</sup> spectra of unmetabolized 4F-PHP (proposed fragment ion structures were reported by Apirakkan et al doi:10.1002/dta.2218).

**Table S1:** Detected phase I and phase II metabolites for 4-MPD, 2-NMC, 4F-PHP and bk-EPDP including summarised diagnostic product ions as discussed in the paper.

| Compound | Proposed structure | Chemical formula                                | Exact mass [M+H] <sup>+</sup> | Diagnostic product ions (m/z) with proposed chemical formula                                                                                                                                                                                                                       | Rt (min) |
|----------|--------------------|-------------------------------------------------|-------------------------------|------------------------------------------------------------------------------------------------------------------------------------------------------------------------------------------------------------------------------------------------------------------------------------|----------|
| 4-MPD    |                    | C <sub>13</sub> H <sub>19</sub> NO              | 206.1539                      | 206.1539, C <sub>13</sub> H <sub>20</sub> NO,<br>188.1434, C <sub>13</sub> H <sub>18</sub> N<br>175.1118, C <sub>12</sub> H <sub>15</sub> O<br>146.0964, C <sub>10</sub> H <sub>12</sub> N<br>133.0646, C <sub>9</sub> H <sub>9</sub> O<br>105.0699, C <sub>8</sub> H <sub>9</sub> | 5.03     |
| M1       |                    | C <sub>13</sub> H <sub>21</sub> NO              | 208.1696                      | 208.1694, C <sub>13</sub> H <sub>22</sub> NO<br>190.1589, C <sub>13</sub> H <sub>20</sub> N<br>177.1273, C <sub>12</sub> H <sub>17</sub> O<br>105.0697, C <sub>8</sub> H <sub>9</sub>                                                                                              | 4.89     |
| M2 (a)   |                    | C <sub>13</sub> H <sub>19</sub> NO <sub>2</sub> | 222.1489                      | 222.1488, C <sub>13</sub> H <sub>20</sub> NO <sub>2</sub><br>204.1383, C <sub>13</sub> H <sub>18</sub> NO<br>186.1278, C <sub>13</sub> H <sub>16</sub> N<br>174.1278, C <sub>12</sub> H <sub>13</sub> N                                                                            | 2.62     |
| M3       |                    | C <sub>12</sub> H <sub>17</sub> NO              | 192.1383                      | 192.1383, C <sub>12</sub> H <sub>18</sub> NO<br>174.1278, C <sub>12</sub> H <sub>16</sub> N<br>119.0492, C <sub>8</sub> H <sub>7</sub> O<br>105.0699, C <sub>8</sub> H <sub>9</sub>                                                                                                | 4.80     |

|         |                                                                                     |                     |          |                                                                                                                                                             |              |
|---------|-------------------------------------------------------------------------------------|---------------------|----------|-------------------------------------------------------------------------------------------------------------------------------------------------------------|--------------|
| M4      | 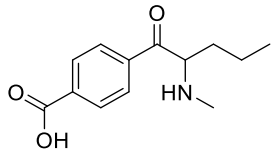   | $C_{13}H_{17}NO_3$  | 236.1281 | 236.1279, $C_{13}H_{18}NO_3$<br>218.1171, $C_{13}H_{16}NO_2$<br>200.1068, $C_{13}H_{14}NO$<br>174.1275, $C_{12}H_{16}N$                                     | 2.44         |
| M5      |    | $C_{19}H_{27}NO_8$  | 398.1809 | 398.1806, $C_{19}H_{28}NO_8$<br>222.1488, $C_{13}H_{20}NO_2$                                                                                                | 2.24         |
| 2-NMC   |    | $C_{12}H_{17}NO$    | 192.1383 | 192.1388, $C_{12}H_{18}NO$<br>147.0804, $C_{10}H_{11}O$<br>119.0855, $C_9H_{11}$                                                                            | 3.49         |
| M6 (a)  |    | $C_{12}H_{19}NO$    | 194.1539 | 194.1540, $C_{12}H_{20}NO$<br>176.1434, $C_{12}H_{18}N$<br>161.1199, $C_{11}H_{15}N$<br>131.0856, $C_{10}H_{11}$<br>105.0698, $C_8H_9$<br>91.0542, $C_7H_7$ | 3.38         |
| M7      |    | $C_{12}H_{17}NO_2$  | 208.1332 | 208.1332, $C_{12}H_{18}NO_2$<br>190.1229, $C_{12}H_{16}NO$<br>149.0962, $C_{10}H_{13}O$<br>133.0648, $C_9H_9O$<br>119.0492, $C_8H_7O$                       | 4.17         |
| M8      |   | $C_{11}H_{15}NO$    | 178.1226 | 178.1226, $C_{11}H_{16}NO$<br>160.1121, $C_{11}H_{14}N$<br>145.0886, $C_{10}H_{11}N$                                                                        | 3.34         |
| M9      |  | $C_{12}H_{19}NO_2$  | 210.1489 | 210.1488, $C_{12}H_{20}NO_2$<br>192.1383, $C_{12}H_{18}NO$<br>149.0961, $C_{10}H_{13}O$<br>131.0856, $C_{10}H_{11}$                                         | 3.55         |
| M10 (b) |  | $C_{12}H_{15}NO_3$  | 222.1125 | 222.1126, $C_{12}H_{16}NO_3$                                                                                                                                | 1.13         |
| M11     |  | $C_{18}H_{25}NO_8$  | 384.1653 | 384.1645, $C_{18}H_{26}NO_8$<br>208.1330, $C_{12}H_{18}NO_2$                                                                                                | 1.03         |
| 4F-PHP  |  | $C_{16}H_{22}FNO$   | 264.1758 | 264.1754, $C_{16}H_{23}FNO$<br>193.1024, $C_{12}H_{14}FO$<br>109.0448, $C_7H_6F$                                                                            | 5.88         |
| M12 (a) |  | $C_{16}H_{24}FNO$   | 266.1915 | 266.1911, $C_{16}H_{25}FNO$<br>248.1806, $C_{16}H_{23}FN$                                                                                                   | 6.42         |
| M13     |  | $C_{16}H_{22}FNO_2$ | 280.1707 | 280.1703, $C_{16}H_{23}FNO_2$<br>123.0239, $C_7H_4FO$                                                                                                       | 3.39<br>3.59 |
| M14     |  | $C_{16}H_{22}FNO_3$ | 296.1656 | 296.1652, $C_{16}H_{23}FNO_3$                                                                                                                               | 5.94         |

|                |                                                                                     |                     |          |                                                                                                                                                    |              |
|----------------|-------------------------------------------------------------------------------------|---------------------|----------|----------------------------------------------------------------------------------------------------------------------------------------------------|--------------|
| M15            | 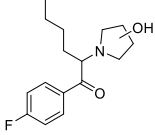   | $C_{16}H_{22}FNO_2$ | 280.1707 | 280.1703, $C_{16}H_{23}FNO_2$<br>156.1383, $C_9H_{18}NO$                                                                                           | 5.31         |
| M16            |    | $C_{16}H_{20}FNO_2$ | 278.1551 | 278.1548, $C_{16}H_{21}FNO_2$<br>154.1224, $C_9H_{16}NO$                                                                                           | 5.77         |
| M17            |    | $C_{22}H_{32}FNO_7$ | 442.2236 | 442.2234, $C_{22}H_{33}FNO_7$                                                                                                                      | 5.52         |
| M18            |    | $C_{22}H_{30}FNO_8$ | 456.2028 | 456.2025, $C_{22}H_{31}FNO_8$                                                                                                                      | 4.67<br>4.80 |
| <b>bk-EPDP</b> |    | $C_{14}H_{19}NO_3$  | 250.1438 | 250.1435, $C_{14}H_{20}NO_3$<br>232.1330, $C_{14}H_{18}NO_2$                                                                                       | 4.38         |
| M19            |   | $C_{12}H_{15}NO_3$  | 222.1125 | 222.1124, $C_{12}H_{16}NO_3$<br>174.0913, $C_{11}H_{12}NO$                                                                                         | 3.95         |
| M20 (a)        |  | $C_{13}H_{19}NO_3$  | 238.1438 | 238.1435, $C_{13}H_{20}NO_3$<br>220.1330, $C_{13}H_{18}NO_2$<br>202.1226, $C_{13}H_{16}NO$<br>193.0859, $C_{11}H_{13}O_3$<br>123.0440, $C_7H_7O_2$ | 2.48         |
| M21            |  | $C_{14}H_{21}NO_3$  | 252.1594 | 252.1592, $C_{14}H_{22}NO_3$                                                                                                                       | 2.69<br>4.23 |
| M22            |  | $C_{14}H_{19}NO_4$  | 266.1387 | 266.1384, $C_{14}H_{20}NO_4$                                                                                                                       | 3.05<br>5.27 |
| M23            |  | $C_{19}H_{27}NO_9$  | 414.1759 | 414.1754, $C_{19}H_{28}NO_9$                                                                                                                       | 2.06         |
| M24 (b)        |  | $C_{13}H_{19}NO_6S$ | 318.1006 | 318.0997, $C_{13}H_{20}NO_6S$                                                                                                                      | 2.48         |
